# Supplementary material for: An efficient method to prepare aluminosilicate nanoscrolls under mild conditions
Source: Royal Society of Chemistry journal article supplement (doi:10.1039/d0cc07291e), 2020-12-14
Supplement: d0cc07291e1.pdf [file d0cc07291e1.pdf]

## Supporting Information

### MATERIALS AND METHODS

#### Materials:

The raw kaolinite (Kaol-R) used in this study was well crystallized, obtained from Zhangjiakou, Hebei Province, China. Hydrogen chloride (HCl) solution (36 wt.%), dimethyl sulfoxide (DMSO), methanol (MeOH), and cetyltrimethyl ammonium bromide (CTAB) were in chemically pure grade and purchased from Xilong Chemical Company, China. All chemicals were used as received.

**Purification of Kaol-R:** 1.0 g Kaol-R was mixed with 2.0 mL 1.0 M HCl solution and stirred at 85 °C for 1 h. The suspension was cooled to room temperature and centrifuged. The precipitate was washed by DI water three times, dried, and referred to as Kaol-P.

**Intercalation of DMSO:** Kaol-P (1.0 g) was dispersed in a mixture of 1.8 g DMSO and 0.2 g distilled water. Then, the mixture was stirred for 2 h at 95 °C in an oil bath. The solid product was separated via centrifugation and dried at 60 °C for 48 h to eliminate the excessive DMSO, and the resultant intercalation compound was ground into powders and referred to as Kaol-DMSO.

**Exfoliating into nanoscrolls:** 1.0 g Kaol-DMSO was mixed with 10 mL AlCl<sub>3</sub>/CTAB/MeOH complex solution. In this complex solution, both the concentration of AlCl<sub>3</sub> and CTAB were 1.0 M. Then, the mixture was stirred for 24 h at room temperature. The precipitate was separated via centrifugation, stored at a wet-state, and referred to as Kaol-CTAB. To investigate the effect of AlCl<sub>3</sub>, a control sample without CTAB was also prepared as follows: 1.0 g Kaol-DMSO was mixed with 10 mL AlCl<sub>3</sub>/MeOH solution. The concentration of AlCl<sub>3</sub> was 1.0 M. The mixture was stirred for 30 min at room temperature. The precipitate was centrifuged and washed to remove the excessive AlCl<sub>3</sub>. The product was dried and ground into powders, referred to as Kaol-Me.

#### Characterization:

X-ray diffractometer (XRD) patterns were recorded using an X-ray diffractometer (XRD Rigaku D/max-2000, Japan) with Cu K $\alpha$  radiation and a graphite monochromator. Dried samples of Kaol-R, Kaol-P, and Kaol-DMSO were scanned from 5-15°. Kaol-CTAB was scanned at a wet-state, and the scan range is from 1-15°. The X-ray fluorescence (XRF) characterization was conducted using a Rigaku ZSX Primus II instrument. Transmission electron microscopy (TEM) images were recorded on a 300 kV Tecnai G2 F30 S-TWIN high-resolution transmission electron microscope. Each sample was dispersed in methanol with the assistance of ultrasonication (ASONE, AS116,

20 W) for 5 min and then a drop of the dispersion was deposited onto a carbon-coated copper grid for TEM imaging.

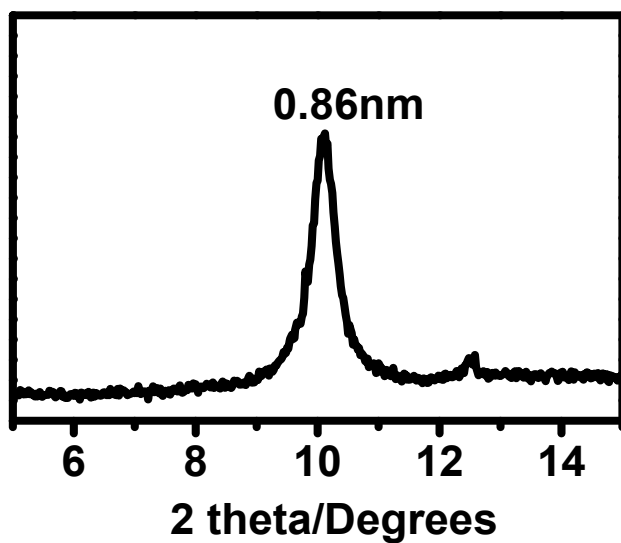

**Figure1.** XRD pattern of Kaol-Me.

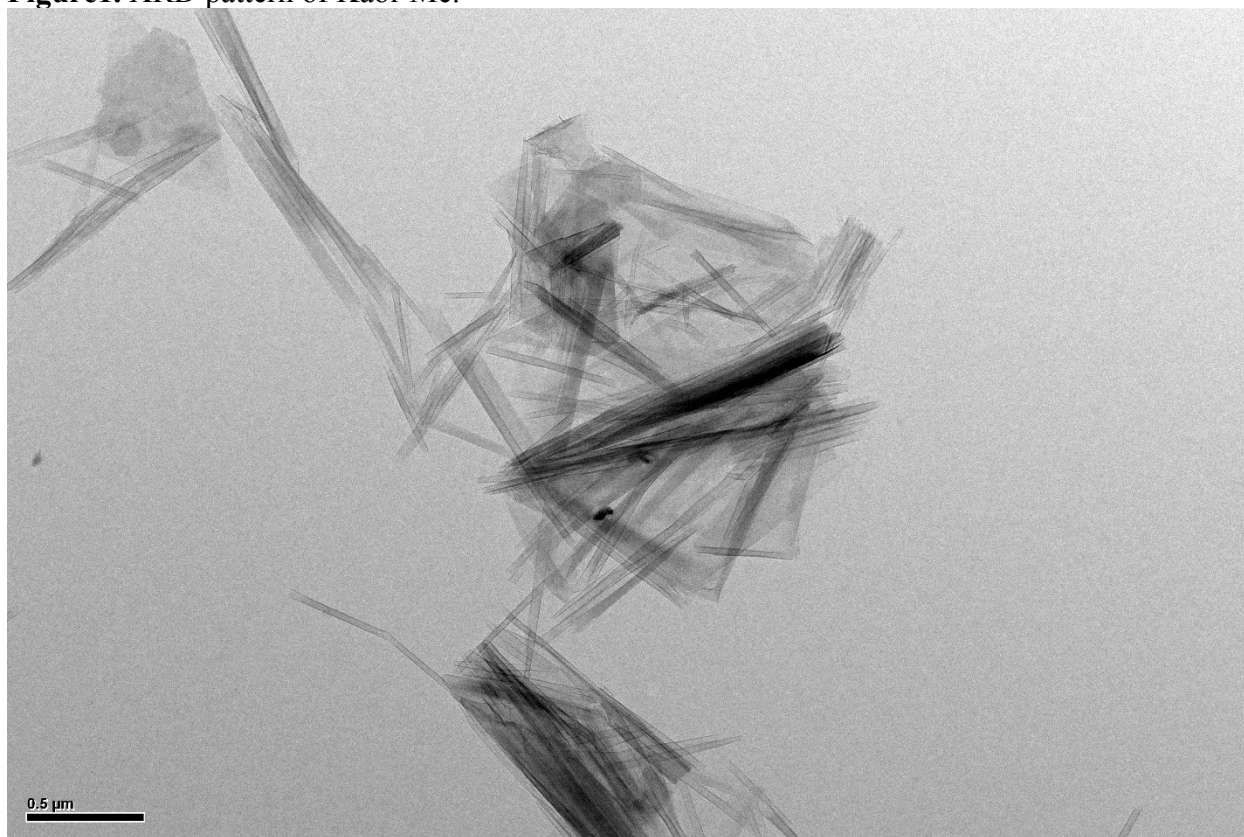

**Figure 2.** Low magnification TEM image of Kaol-CTAB.
